# Supplementary material for: Three-dimensional label-free imaging throughout adipocyte differentiation by stimulated Raman microscopy
Source: PLoS One. 2019 May 21;14(5):e0216811. doi: 10.1371/journal.pone.0216811 (PMC6528968; doi:10.1371/journal.pone.0216811)
Supplement: S1 File — (XLSX) [file pone.0216811.s006.xlsx]

## Sheet: Foglio1
Bodipy								ORO								LTR
D5	D10	D15		D5	D10	D15		D5	D10	D15		D5	D10	D15		D5	D10	D15		D5	D10	D15
4.67358	1.95967	3.07751		0.664424	4.71196	2.45933		0.540786	0.664424	1.36		0.664424	1.14932	1.22656		0.489919	3.07751	2.0348		0.865463	3.6625	3.86879
2.68666	2.51522	5.02471		1.47337	1.07459	1.62778		0.418326	2.8041	1.26		0.237463	3.36365	1.36778		0.395719	3.7994	1.74278		1.40955	2.60023	1.22656
2.68666	2.32234	1.69631		0.738606	0.540786	7.3885		0.489919	3.90373	5.8		0.220507	1.5386	12.365		0.664424	2.60023	1.88879		3.86879	1.60525	1.00237
2.83385	1.67331	7.30246		1.1304	2.83385	9.95137		5.80774	4.90625	5.34		0.373738	3.17659	9.487		1.09303	5.02471	3.33123		2.86376	3.42896	4.93656
2.32234	1.45194	5.85053		2.13716	3.33123	6.53846		0.373738	11.3951	12.4347		0.723456	13.5615	15.63		2.43162	3.20311	2.86376		1.88596	2.57174	1.00237
2.0096	1.78988	10.8048		2.24204	2.92441	13.0775		2.5434	13.14	10.1736		0.264074	5.76512	10.23		3.90373	2.86376	2.92405		2.98496	4.94558	2.7567
4.94558	13.6503	5.59619		2.08567	3.01566	7.61939		1.71946	8.65258	5.5		2.24204	12.7745	11.978		0.664424	2.92405	13.6503		0.341946	1.5386	14.85
3.86879	11.2164	14.7179		3.86879	6.92441	7.30246		1.49495	10.6644	11.3		1.07459	13.14	28.56		7.20701	3.86879	9.59674		2.16315	2.76312	15.11
3.4949	7.44682	5.18485		3.7994	13.7815	5.85053		1.45194	12.8041	6.263		1.47337	11.5386	26.34		4.37214	3.42157	5.95406		1.93495	8.5479	6.06
1.32665	9.0746	7.81		0.753914	12.0911	7.86103		0.418326	13.9037	26.1349		0.441563	15.0247			0.915624	5.97982	10.8202		2.0348	9.10376	7.65
1.47337	7.25466	16.5385		1.58287	10.8802	10.8048		0.212264	14.9062	42.5231		0.594167	9.59419			2.40406	6.78523	15.1522		2.32234	10.1876	7.19
1.49495	12.248	36.6194		2.0348	14.297	5.59619		1.40644	7.98824	20.0195		0.301754	11.6963			11.6962	9.45211	10.5783		1.38859	13.299	12.06
1.98456	9.67128	17.861		2.5434	8.03626	15.1286		1.40644	11.1493	17.4885		0.755398	7.12615			0.785	6.1544	13.2234		2.95443	11.5167	13.5
2.0348	5.93656	29.7873		3.42896	12.4333	47.8819		1.7326	8.36365			1.60525	11.953			1.09303	13.6625	6.73306		2.18929	11.0746	6.17
4.40927	6.5111	39.1272		0.567163	12.6562	29.5942		3.36365	9.5386			3.73063	12.4593			2.0096	11.2266	14.5194		3.26686	12.0702	9.652
0.785	25.9541	29.1142		1.16839	21.39	55.1262		0.553896	8.14			4.15265	11.6278			0.664424	8.24062	11.2164		4.40927	13.7899	8.547
0.785	20.8202			1.86171	18.2374	31.953		0.723456	13.7994			4.15265	10.0239			2.43162	5.55435	30.8606		0.915624	12.4041	14.0955
0.785	20.5783			1.93495	29.981			1.00237	15.4752			0.594167	7.30317			0.785	12.8638	57.2513		0.264074	10.2019	22.8059
0.489919	30.8606			8.75715				1.62778	13.0775			1.34714	12.3			0.800779	13.95	39.1272		0.453416	11.1336	29.8841
9.0213				9.89296				2.6577	8.60054			1.78988	7.694			1.00237	13.8688	63.4438		0.594167	12.2156	45.6712
11.6357				8.0384				1.38859	7.54385			1.22656	8.6479			1.14932	12.248	18.4652		0.540786	1.71946	26.5871
11.9398				8.24062				2.5434	13.3312			1.88596	9.1			2.62889	14.8542	20.498		1.16839	7.19	22.4211
7.065				8.0384				7.78916	14.5689			0.465427	16.9737			3.07751	8.69649	28.828		1.38859	9.34346	28.1746
6.19844				9.15951				5.71174	8.7569			12.248	7.98824			11.6962	13.3249	45.9402		1.27896	1.85547	28.5101
5.47114				7.55435				4.86708	10.412			9.67128				9.34346	15.1976			12.3494	8.3256	35.6312
7.15951				6.5111				6.5564	15.4752			5.93656				14.6178	18.3891			10.6644	16.7933
5.55435				8.55523				7.78916	12.481			6.5111				5.42977	18.771			10.3317	18.771
				8.5935				9.0746	15.4752			6.92441				13.1316				12.8338	18.6376
								7.25466				6.92441				6.28699				12.5717	19.2405
																6.60185				11.5278	18.6879
																				12.4183
																				8.9351
Lipid Droplt Area	0-5 um2
	5-15 um2
	≥ 15 um2
